# Supplementary material
Source: Research Square preprint supplement (doi:10.21203/rs.3.rs-9741821/v1)
Supplement: Supplementary file 1 [file c968f2b79eca04ff82a88819.xlsx]

## Sheet: Página1
cultivares	amostra	familia	genero	especie	quantidade
coratina	1	gigasporaceae	gigaspora	rosea	27
coratina	1	gigasporaceae	gigaspora	decipiens	15
coratina	1	gigasporaceae	scutellospora	calospora	0
coratina	1	diversisporaceae	diversispora	globifera	39
coratina	1	glomeraceae	glomus	ambisporum	120
coratina	1	acaulosporaceae	acaulospora	koskei	0
coratina	2	gigasporaceae	gigaspora	rosea	20
coratina	2	acaulosporaceae	acaulospora	koskei	0
coratina	2	gigasporaceae	scutellospora	calospora	0
coratina	2	gigasporaceae	gigaspora	decipiens	12
coratina	2	diversisporaceae	diversispora	globifera	47
coratina	2	glomeraceae	glomus	ambisporum	77
coratina	3	gigasporaceae	gigaspora	rosea	5
coratina	3	gigasporaceae	gigaspora	decipiens	10
coratina	3	acaulosporaceae	acaulospora	koskei	0
coratina	3	gigasporaceae	scutellospora	calospora	0
coratina	3	diversisporaceae	diversispora	globifera	30
coratina	3	glomeraceae	glomus	ambisporum	84
coratina	4	gigasporaceae	gigaspora	rosea	17
coratina	4	acaulosporaceae	acaulospora	koskei	0
coratina	4	gigasporaceae	scutellospora	calospora	0
coratina	4	gigasporaceae	gigaspora	decipiens	10
coratina	4	diversisporaceae	diversispora	globifera	39
coratina	4	glomeraceae	glomus	ambisporum	70
picual	1	gigasporaceae	gigaspora	rosea	61
picual	1	acaulosporaceae	acaulospora	koskei	0
picual	1	gigasporaceae	scutellospora	calospora	0
picual	1	gigasporaceae	gigaspora	decipiens	15
picual	1	diversisporaceae	diversispora	globifera	24
picual	1	glomeraceae	glomus	ambisporum	92
picual	2	gigasporaceae	gigaspora	rosea	16
picual	2	acaulosporaceae	acaulospora	koskei	0
picual	2	gigasporaceae	scutellospora	calospora	0
picual	2	gigasporaceae	gigaspora	decipiens	10
picual	2	diversisporaceae	diversispora	globifera	43
picual	2	glomeraceae	glomus	ambisporum	77
picual	3	gigasporaceae	gigaspora	rosea	35
picual	3	gigasporaceae	gigaspora	decipiens	26
picual	3	gigasporaceae	scutellospora	calospora	0
picual	3	diversisporaceae	diversispora	globifera	35
picual	3	acaulosporaceae	acaulospora	koskei	27
picual	3	glomeraceae	glomus	ambisporum	87
picual	4	gigasporaceae	gigaspora	rosea	55
picual	4	gigasporaceae	gigaspora	decipiens	29
picual	4	diversisporaceae	diversispora	globifera	21
picual	4	acaulosporaceae	acaulospora	koskei	15
picual	4	gigasporaceae	scutellospora	calospora	9
picual	4	glomeraceae	glomus	ambisporum	54
picual	4	acaulosporaceae	acaulospora	koskei	0
arbequina	1	gigasporaceae	gigaspora	rosea	25
arbequina	1	acaulosporaceae	acaulospora	koskei	0
arbequina	1	gigasporaceae	scutellospora	calospora	0
arbequina	1	gigasporaceae	gigaspora	decipiens	47
arbequina	1	diversisporaceae	diversispora	globifera	19
arbequina	1	glomeraceae	glomus	ambisporum	52
arbequina	2	gigasporaceae	gigaspora	rosea	18
arbequina	2	gigasporaceae	gigaspora	decipiens	27
arbequina	2	diversisporaceae	diversispora	globifera	11
arbequina	2	gigasporaceae	scutellospora	calospora	0
arbequina	2	acaulosporaceae	acaulospora	koskei	0
arbequina	2	glomeraceae	glomus	ambisporum	58
arbequina	3	gigasporaceae	gigaspora	rosea	21
arbequina	3	gigasporaceae	gigaspora	decipiens	46
arbequina	3	diversisporaceae	diversispora	globifera	9
arbequina	3	acaulosporaceae	acaulospora	koskei	0
arbequina	3	glomeraceae	glomus	ambisporum	56
arbequina	3	gigasporaceae	scutellospora	calospora	13
arbequina	4	gigasporaceae	gigaspora	rosea	22
arbequina	4	gigasporaceae	gigaspora	decipiens	36
arbequina	4	diversisporaceae	diversispora	globifera	27
arbequina	4	gigasporaceae	scutellospora	calospora	19
arbequina	4	glomeraceae	glomus	ambisporum	67
arbequina	4	acaulosporaceae	acaulospora	koskei	0
